# Supplementary material for: Phylogenetic Relationships among TnpB-Containing Mobile Elements in Six Bacterial Species
Source: MDPI journal article supplement (doi:10.3390/genes14020523), 2023-02-19
Supplement: s1 [file s1]

ISHp608

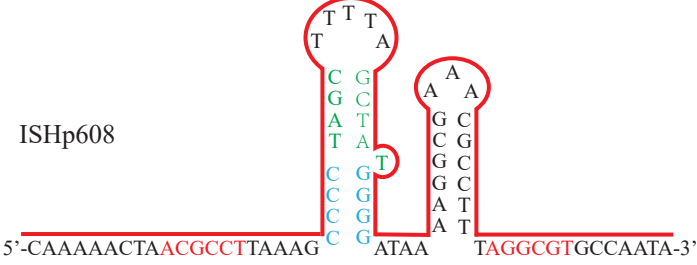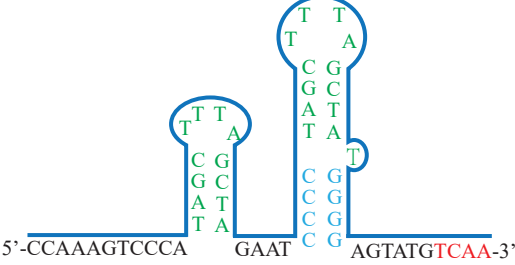

IS605

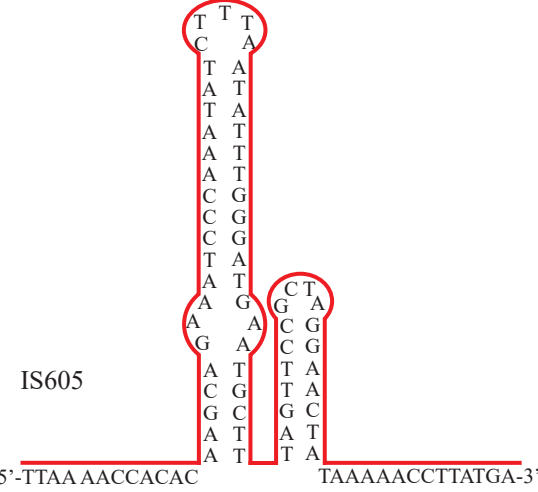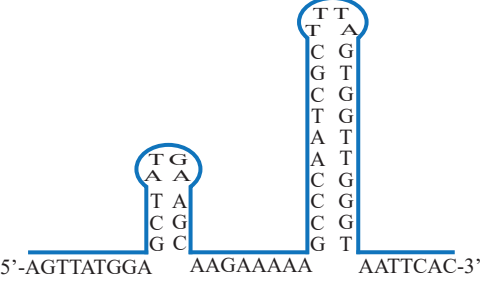

IS606

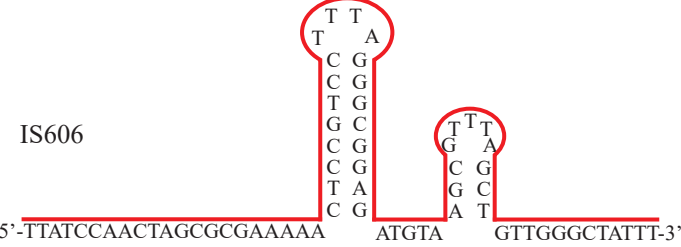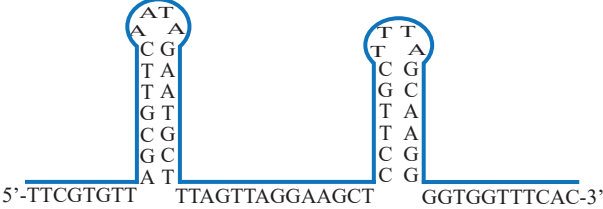

ISBce23

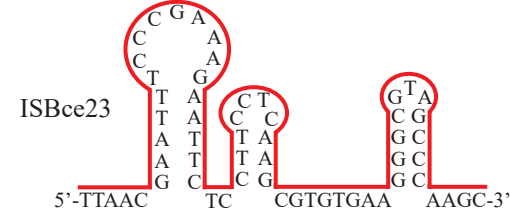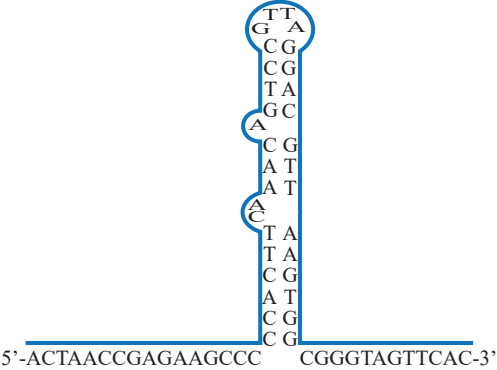

ISBce3

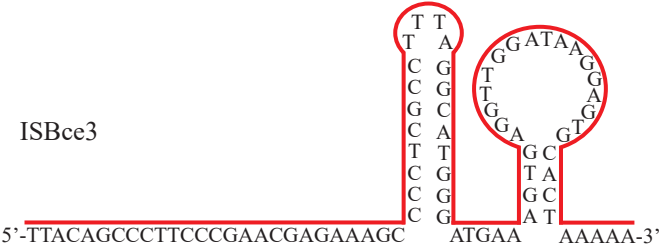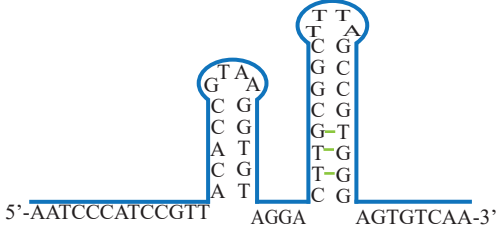

ISBce24

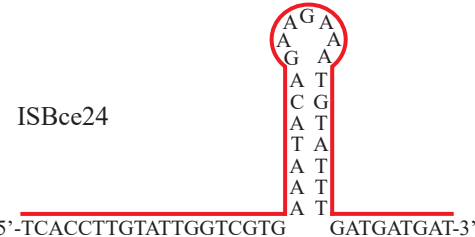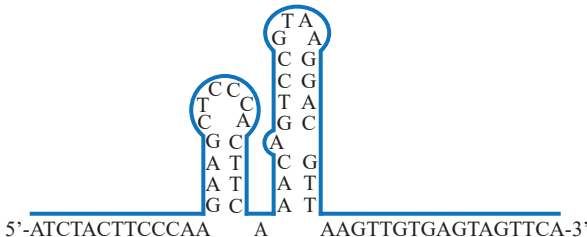

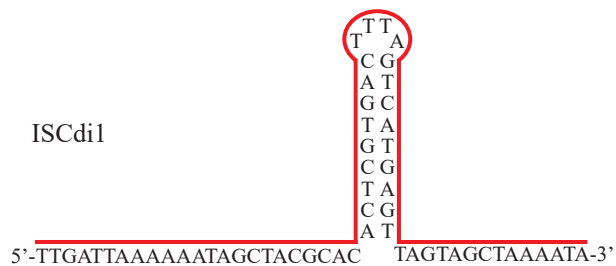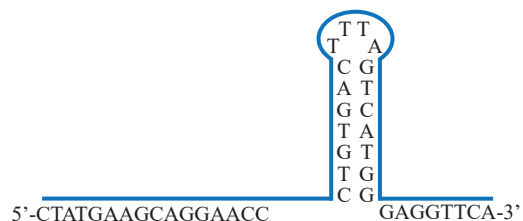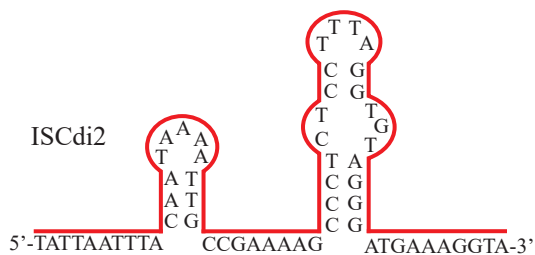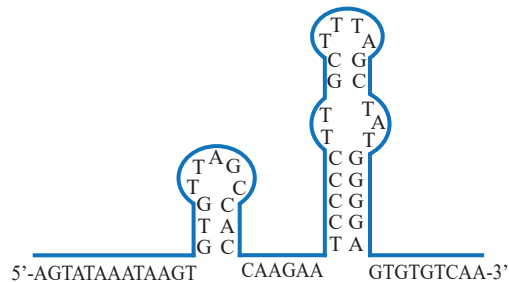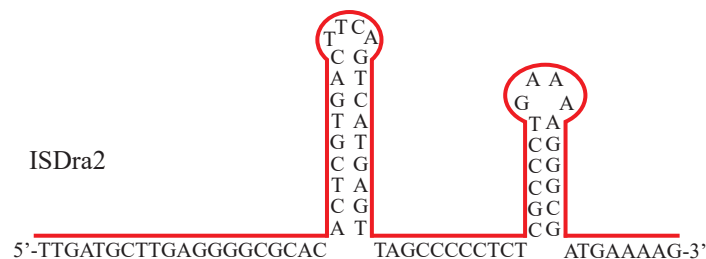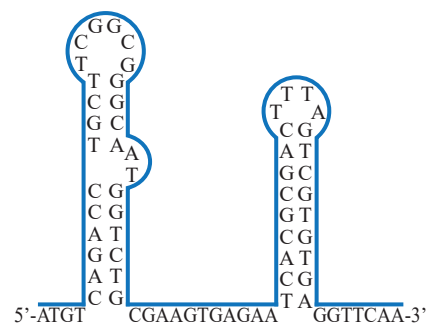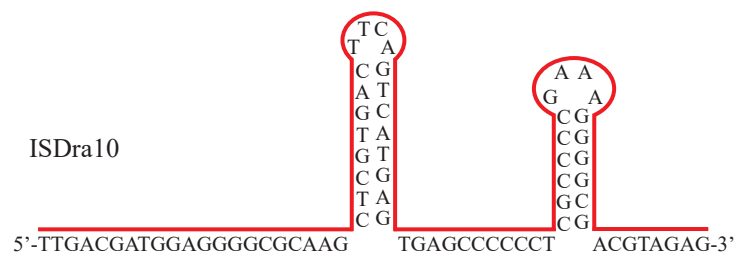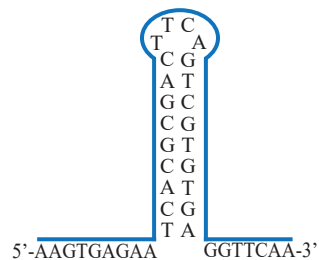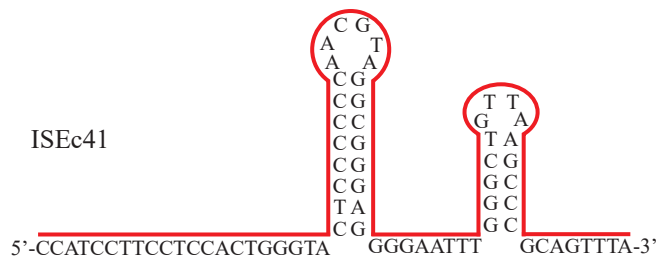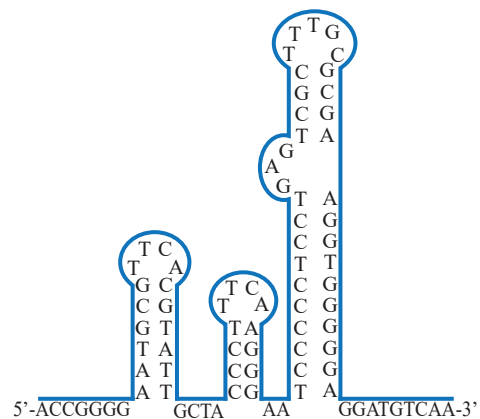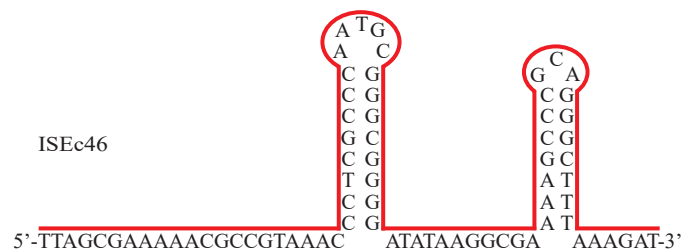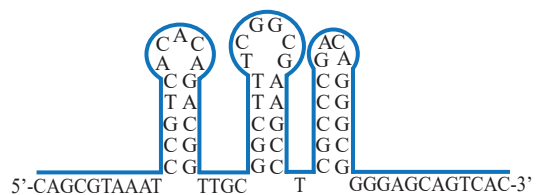

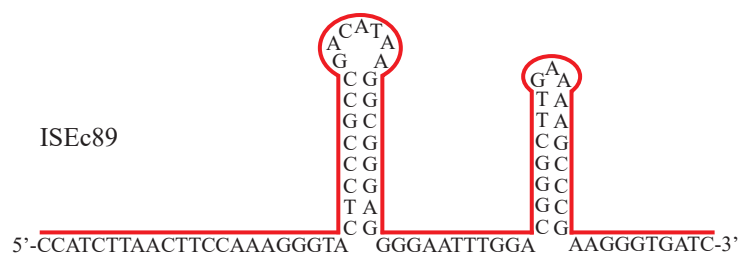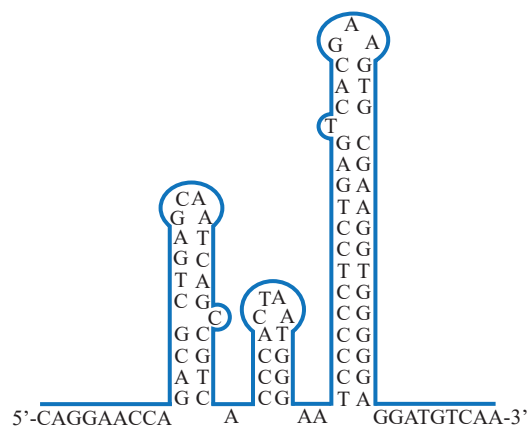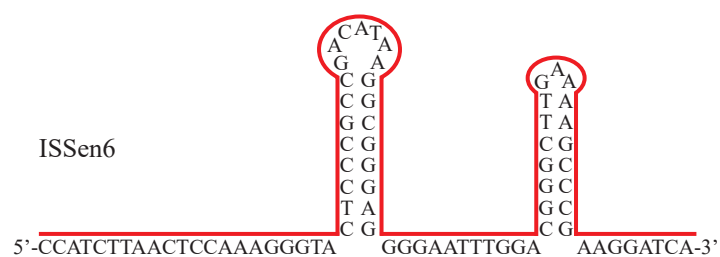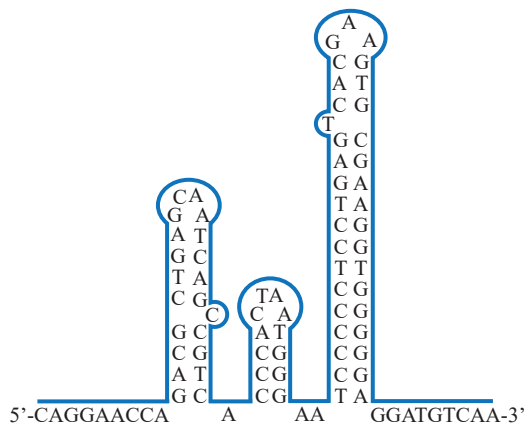

Supplementary file S1. The terminal structure of IS605 subgroup. The left ends were showed in red. The right ends were showed in blue. The hairpin structure of the terminal ends were predicted by Mfold (DNA Folding Form (mfold.org) ) and (RNAfold web server (univie.ac.at)).
