# Supplementary material for: Phylogenetic Relationships among TnpB-Containing Mobile Elements in Six Bacterial Species
Source: Genes (Basel). 2023 Feb 19;14(2):523. doi: 10.3390/genes14020523 (PMC9956272; doi:10.3390/genes14020523)
Supplement: Supplementary file 1 [file genes-14-00523-s001.zip › supplementary Table S1.xlsx]

## Sheet: Sheet1
Family	Superfamily	Family	Subfamily	IS name	Homology sequence/host in Isfinder	host in Isfinder	Sequence similarity of OrfA %	Sequence similarity of OrfB %	Subgroup genome number	Subgroup total number	Number of full TAEs with boundary	Number of intact TAEs	Number of truncated TAEs	Nuleotid sequence Length Variation	Sequence identity of full IS (%/ sequence number)	OrfA type	Length variation of OrfA	Sequence identity of OrfA (%/ sequence number)	Length variation of OrfB	Sequence identity of OrfB (%/ sequence number)	LE cleavage site	RE cleavage site
Deinococcus_radiodurans	TAE	IS605	IS605a	ISDra2	ISDra2	Deinococcus_radiodurans	1	1	12	20	20	20	0	1740-1741	93.2/20	Y1	140	100/20	408	99.9/20	TTGAT	TCAA
		IS605	IS605a	ISDra10	ISDra2	Deinococcus_radiodurans	0.81	0.83	12	12	12	12	0	1744	100/12	Y1	131	100/12	409	100/12	TTGAC	TCAA
					unclassified					12													frameshifted; internal stop，without boundaries
Helicobacter_pylor		IS607	IS607a	ISHp2	ISCco7	Campylobacter coli	0.78	0.63	23	30	26	20	10	2398-2407	99.3/20	Serine	210-212	86.1/21	413	99.0/27	TA	TA
		IS607	IS607a	ISHp3	ISAfe11	Acidithiobacillus ferrooxidans	0.56	0.4	5	16	13	13	3	2094-2096	94.6/13	Serine	190-192	96.5/13	443-447	93.2/14	TA	AG
		IS607	IS607a	IS607	IS607	Helicobacter pylori	0.99	0.99	61	185	176	169	16	2023-2037	97.8/169	Serine	217-219	97.9/174	418-425	97.3/176	GG	GG
		IS605	IS605a	ISHp608	ISHp608	Helicobacter pylori	0.97	0.91	58	88	78	76	11	1811-1849	93.3/76	Y1	155-173	98.7/76	372-407	94.2/87	TTAC/TTGAT	TCAA
		IS605	IS605c	IS606	IS606	Helicobacter pylori	0.97	0.84	90	203	179	83	120	1966-1986	92.2/124	Y1	122-142	91.9/170	419-466	89.6/144	TTAT	TTCA
		IS605	IS605c	IS605	IS605	Helicobacter pylori	0.95	0.94	66	211	206	182	29	1882-1892	96.3/190	Y1	129-148	94.8/199	375-438	95.1/200	TTTAA	TTCA
Clostridioides difficile		IS605	IS605b	ISCdi1	ISCpe2/ISBth17	Clostridium perfringens/Bacillus thuringiensis	15/68%	0.53	131	1676	1581	1231	445	1770-2218	94.2/1231	Y1	135	98.4/15	348-372	96.2/1231	TTGAT	TTCA
		IS605	IS605a	ISCdi2	ISHp608/ISSoc14	Helicobacter pylori/Synechococcus sp.	0.61	0.31	58	62	60	56	6	1801-1853	99.4/56	Y1	132	97.9/60	387	99.6/56	TATT	TCAA
		IS607	IS607b	ISCdi3	ISCbt3	Clostridium botulinum	69%	0.8	13	23	12	9	14	1826-1988	99.9/9	Serine	152	99.9/9	390	97.6/14	GG	AG
		IS1341	IS1341	ISCdi4	ISAsp8	Anabaena sp.	—	0.45	107	107	107	103	4	1598-1599	98.0/103	—	—	—	425-437	99.2/103	TTAT	TTAC
					unclassified	0				7			4
Salmonella_enterica		IS605	IS605c	ISSen6	ISEc44	Escherichia coli	100%	0.93	305	310	310	138	172	1813-1824	98.4/138	Y1	134-143	97.8/149	402-410	98.3/299	CCAT	TCAA
		IS1341	IS1341	ISSen17	ISEc46	Escherichia coli	—	0.83	40	41	28	28	13	2381-2382	99.8/28	—	—	—	391	97.3/33	TTAT	TCAC
		IS1341	IS1341	ISSen18	ISEc42	Escherichia coli	—	0.87	349	379	355	353	26	1255-1261	99.4/353	—	—	—	376	99.2/353	GGCC	TCAA
		IS1341	IS1341	ISSen19	ISRor6	Raoultella ornithinolytica	—	0.83	40	47	37	31	16	1289-1304	91.8/31	—	—	—	402	95.1/31	GGGGA	TCAA
		IS1341	IS1341	ISSen20	ISEc42	Escherichia coli	—	0.81	47	47	27	23	24	1303-1308	98.7/27	—	—	—	388	99.3/23	TTAT	TCAA
					unclassified	0				7			7
Bacillus_cereus		IS605	IS605b	ISBce23	ISBth16	Bacillus thuringiensis	98%	0.97	77	103	45	31	72	1786-1829	97.4/31	Y1	132-139	97.8/45	366-370	96.7/85	TTAA	TTCA
		IS605	IS605b	ISBce3	ISBce3	Bacillus cereus	0.94	0.92	22	32	32	20	12	1809-1825	93.0/20	Y1	132-135	96.1/22	321-362	92.8/24	TTAC	TCAA
		IS605	IS605b	ISBce24	ISBth16//ISEfa4	Enterococcus faecium	0.91	0.57	4	4	4	4	0	1699-1791	95.8/4	Y1	103-134	88.4/3	362	98.1/4	TCAC	TTCA
		IS607	IS607a	ISBce17	ISBce17	Bacillus cereus	1	1	39	43	31	2	41	1965	86.2/27	Serine	150	97.0/3	385	91.4/27	GG	AG
		IS607	IS607b	ISBce25	ISCbo6	Clostridium botulinum	84%	0.67	12	17	3	3	14	1699-11791	99.8/3	Serine	213	99.3/3	372	86.2/11	GG	GG
		IS1341	IS1341	ISBce26	ISCbt1	Clostridium botulinum	—	0.44	4	4	4	4	0	1835-1836	96.7/4	—	—	—	497-498	96.0/4	TCAC	TCAG
		IS1341	IS1341	ISBce27	ISEfa4	Enterococcus faecium	—	0.51	3	3	3	3	0	1251-1252	100/3	—	—	—	362	100/3	TTAT	TTCA
		IS1341	IS1341	ISBce28	ISBth15	Bacillus thuringiensis	—	0.42	41	69	69	47	22	1287-1299	96.7/47	—	—	—	376-379	96.7/47	TTTAC	TCGG
		IS1341	IS1341	ISBce29	ISBth17	Bacillus thuringiensis	—	0.96	84	234	187	152	82	1383-1429	91.1/152	—	—	—	360-385	90.4/160	TTAT	TCAA
		IS1341	IS1341	ISBce30	ISAsp8	Anabaena sp.	—	0.34	43	60	53	53	7	1922-2277	89.9/47	—	—	—	451-494	89.6/49	TTTAT	TGAC
		IS1341	IS1341	ISBce31	ISBth16	Bacillus thuringiensis	—	0.84	41	49	44	44	5	1510-1526	94.9/45	—	—	—	366-376	93.6/45	TTTAA	TTCA
		IS1341	IS1341	ISBce32	ISBth14	Bacillus thuringiensis	—	0.97	35	37	36	35	2	1665-1671	95.9/35	—	—	—	454-504	95.2/35	TTCT	TTCA
		IS1341	IS1341	ISBce33	ISNph28	Natronomonas pharaonis	—	0.33	10	10	9	8	2	1660-1668	96.2/8	—	—	—	443	96.1/8	AATA	AAAT
					unclassified	0				22			22					—
E. coli		IS605	IS605c	IS609	IS609	Escherichia coli	1	1	2046	4145	3820	1278	2867	1637-2247	90.8/1234	Y1	141-164	88.7/1451	364-547	94.9/3698	TTAT	TCAA
		IS605	IS605c	ISEc46	ISEc46	Escherichia coli	1	1	191	196	196	185	11	1766-1775	99.5/185	Y1	102	99.6/193	389	99.2/187	TTAG	TCAC
		IS605	IS605c	ISEc41	ISEc41	Escherichia coli	1	1	65	65	65	59	6	1845-1846	99.9/59	Y1	150	99.9/64	401	99.8/59	CCAT	TCAA
		IS605	IS605c	ISEc89	ISSen6	Salmonella enterica	1	1	37	43	40	39	4	1821-1883	98.2/39	Y1	146	99.5/40	409-410	97.8/41	CCAT	TCAA
		IS1341	IS1341	ISEc42	ISEc42	Escherichia coli	—	1	164	165	165	161	4	1294-1295	99.8/161	—	—	—	376	99.9/161	TCAT	TCAA
		IS1341	IS1341	ISEc90	ISEc42	Escherichia coli	—	84%-86%	12	12	10	10	2	1296	99.9/10	—	—	—	376	99.9/10	TTAT	TCAA
		IS1341	IS1341	ISEc91	ISEc46	Escherichia coli	—	0.83	76	79	51	48	31	1333-1336	92.0/48	—	—	—	389-393	92.0/50	TCAGC	TCAC
		IS1341	IS1341	ISEc92	IS609	Escherichia coli	—	92%-95%	64	69	57	51	18	1339-1340	94.2/51	—	—	—	402-404	94.9/52	TTAT	TCAC/TCAA
		IS1341	IS1341	ISEc93	ISRor6	Raoultella ornithinolytica	—	0.91	8	8	8	8	0	2094	99.8/8	—	—	—	402	99.8/8	TTAT	TCAA
		copy<10			unclassified					43
	non-TAE									12
